# Supplementary material for: Polymeric nanowire architectureElectronic supplementary information (ESI) available: frontispiece figure. See http://www.rsc.org/suppdata/jm/b4/b401804b/
Source: Royal Society of Chemistry journal article supplement (doi:10.1039/b401804b), 2004-01-01
Supplement: b401804b.pdf [file b401804b.pdf]

# *Journal of Materials Chemistry* Highlight

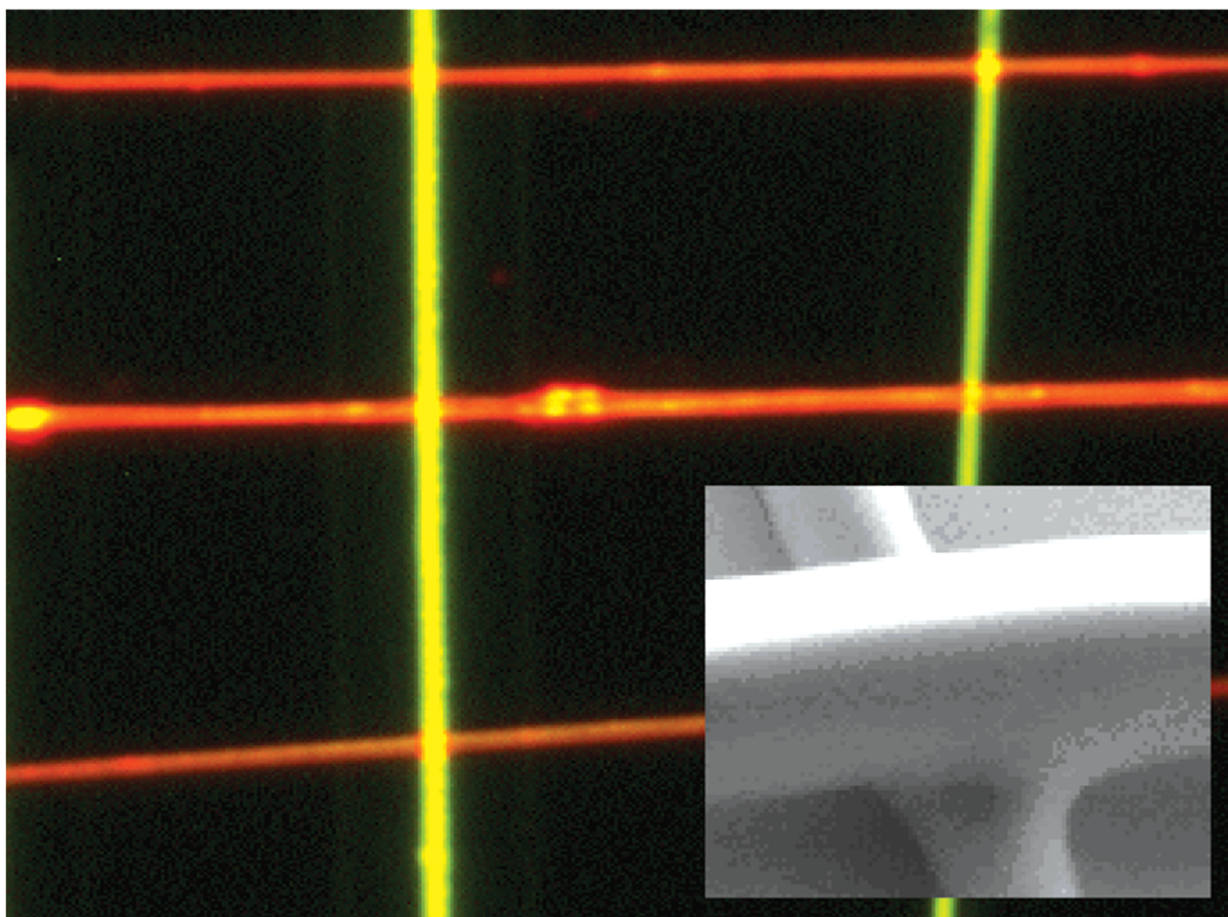

## **Polymeric nanowire architecture**

Jun Kameoka,\* David Czaplewski, Haiqing Liu and Harold G. Craighead
